# Supplementary material
Source: PubMed Central journal article supplement (PMC5829965)
Supplement: DC171740SupplementaryData.pdf [file DC171740SupplementaryData.pdf]

SUPPLEMENTARY DATA

**Supplementary Table 1.** Baseline demographic and clinical characteristics of study sub-cohorts and original full cohorts.

|                                         | <b>VADT<br/>Sub-study</b> | <b>VADT<br/>Full Cohort</b> | <b>ACCORD<br/>Sub-study</b> | <b>ACCORD<br/>Full Cohort</b> |
|-----------------------------------------|---------------------------|-----------------------------|-----------------------------|-------------------------------|
| <b>n</b>                                | 445                       | 1,791                       | 271                         | 5,518                         |
| <b>Age (years)</b>                      | 59 ± 8                    | 60 ± 9                      | 64 ± 6                      | 62 ± 7                        |
| <b>BMI (kg/m<sup>2</sup>)</b>           | 31 ± 4                    | 31 ± 4                      | 32 ± 5                      | 32 ± 5                        |
| <b>Male sex (%)</b>                     | 97                        | 97                          | 76                          | 69                            |
| <b>Non-Hispanic White (%)</b>           | 63                        | 62                          | 70                          | 68                            |
| <b>Median diabetes duration (years)</b> | 10                        | 10                          | 10                          | 9                             |
| <b>Hemoglobin A1c (%)</b>               | 9.4 ± 1.5                 | 9.4 ± 1.5                   | 8.3 ± 1.0                   | 8.3 ± 1.0                     |

Plus-minus values are means ± SD
